# Supplementary material for: Design and synthesis of C3-symmetric molecules bearing propellane moieties via cyclotrimerization and a ring-closing metathesis sequence
Source: PubMed Central journal article supplement (PMC6204777; doi:10.3762/bjoc.14.230), 2018-10-01

**Supporting Information**

**for**

**Design and synthesis of  $C_3$ -symmetric molecules bearing propellane moieties via cyclotrimerization and a ring-closing metathesis sequence**

Sambasivarao Kotha\*, Saidulu Todeti, and Vikas R. Aswar

Address: Department of Chemistry, Indian Institute of Technology Bombay, Powai, Mumbai-400076, India, Fax: +91(22)-2572 7152

Email: Sambasivarao Kotha - [srk@chem.iitb.ac.in](mailto:srk@chem.iitb.ac.in)

\*Corresponding author

**Copies of  $^1\text{H}$ ,  $^{13}\text{C}$  NMR and HRMS spectra of new compounds**

# <sup>1</sup>H NMR of compound 11 in CDCl<sub>3</sub>

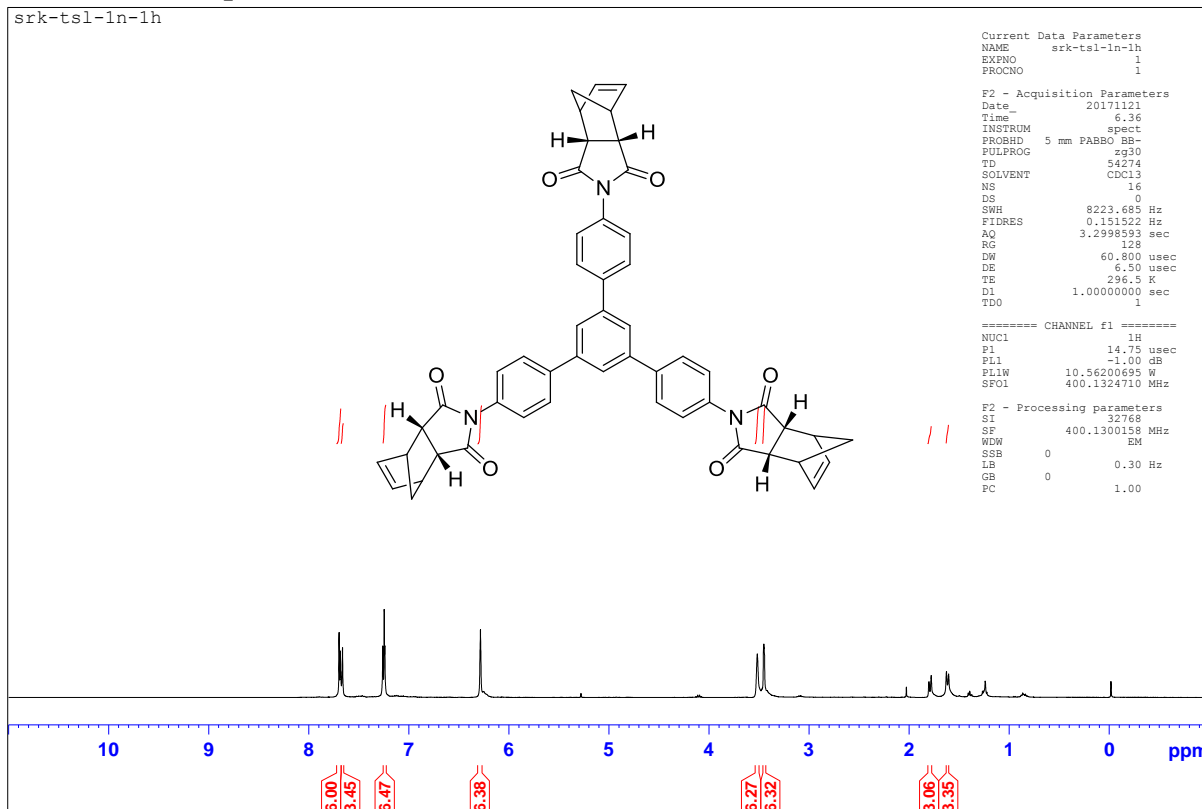

# <sup>13</sup>C NMR of compound 11 in CDCl<sub>3</sub>

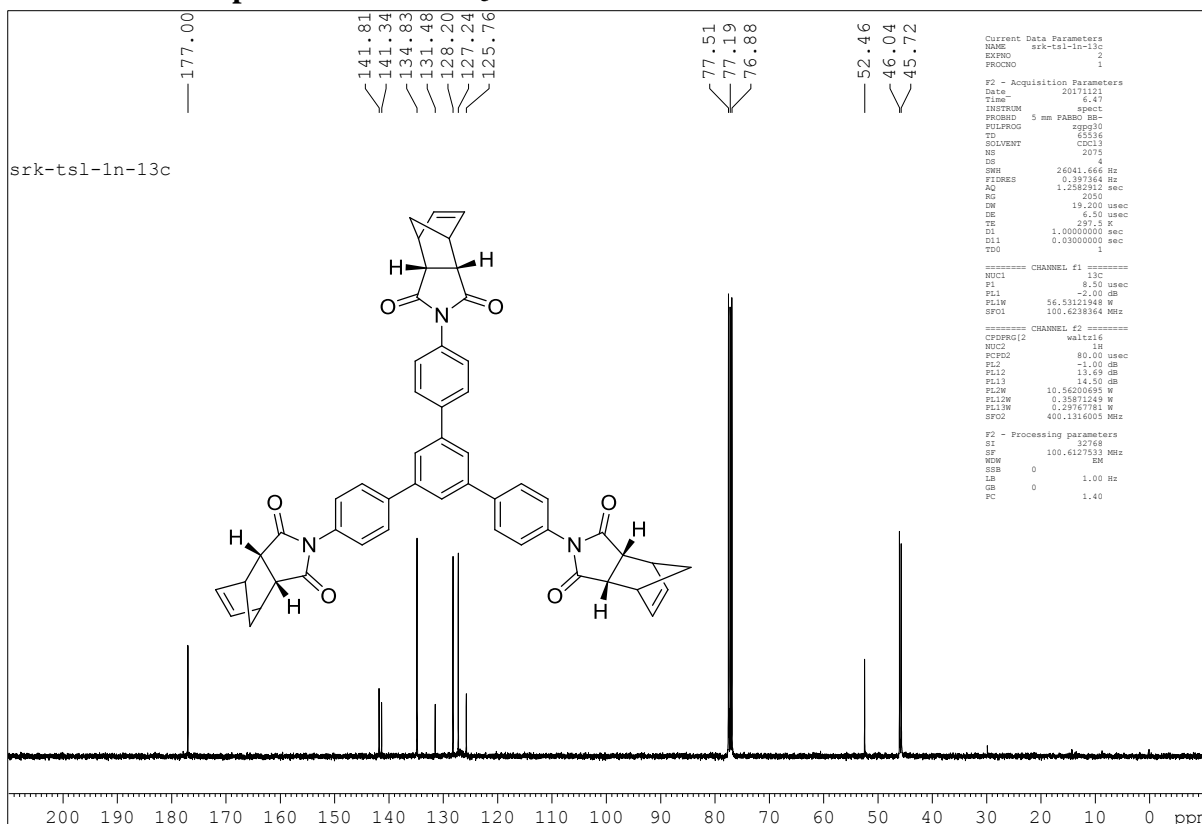

# HRMS of Compound 11

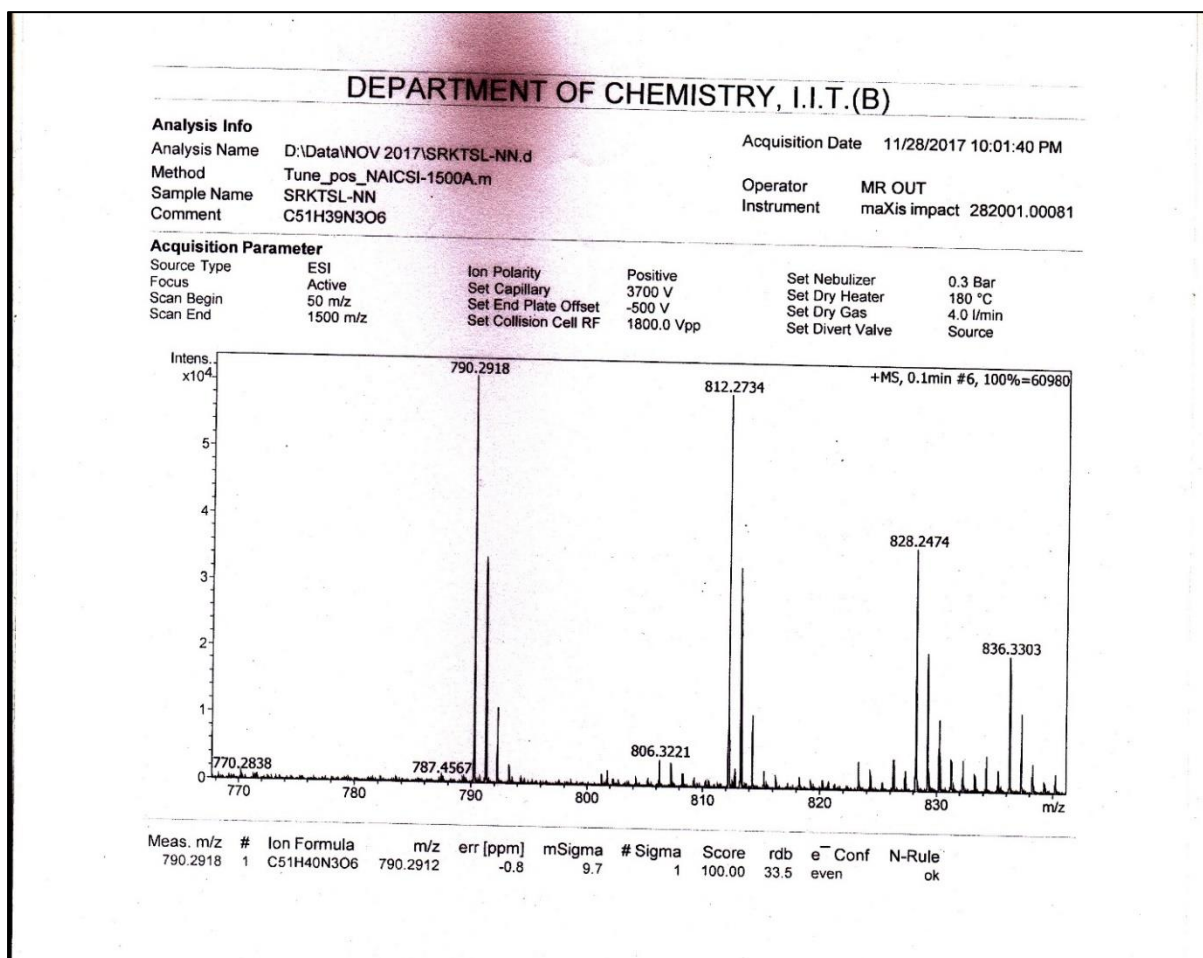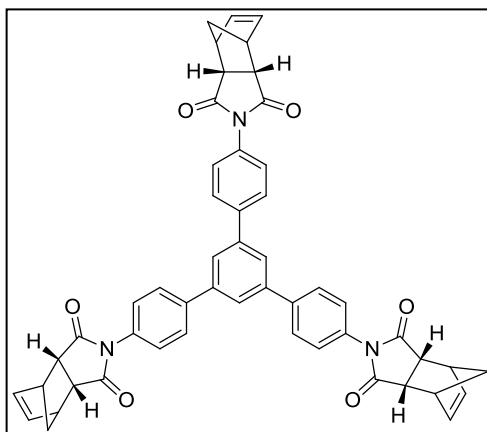

# <sup>1</sup>H NMR of compound 19 in CDCl<sub>3</sub>

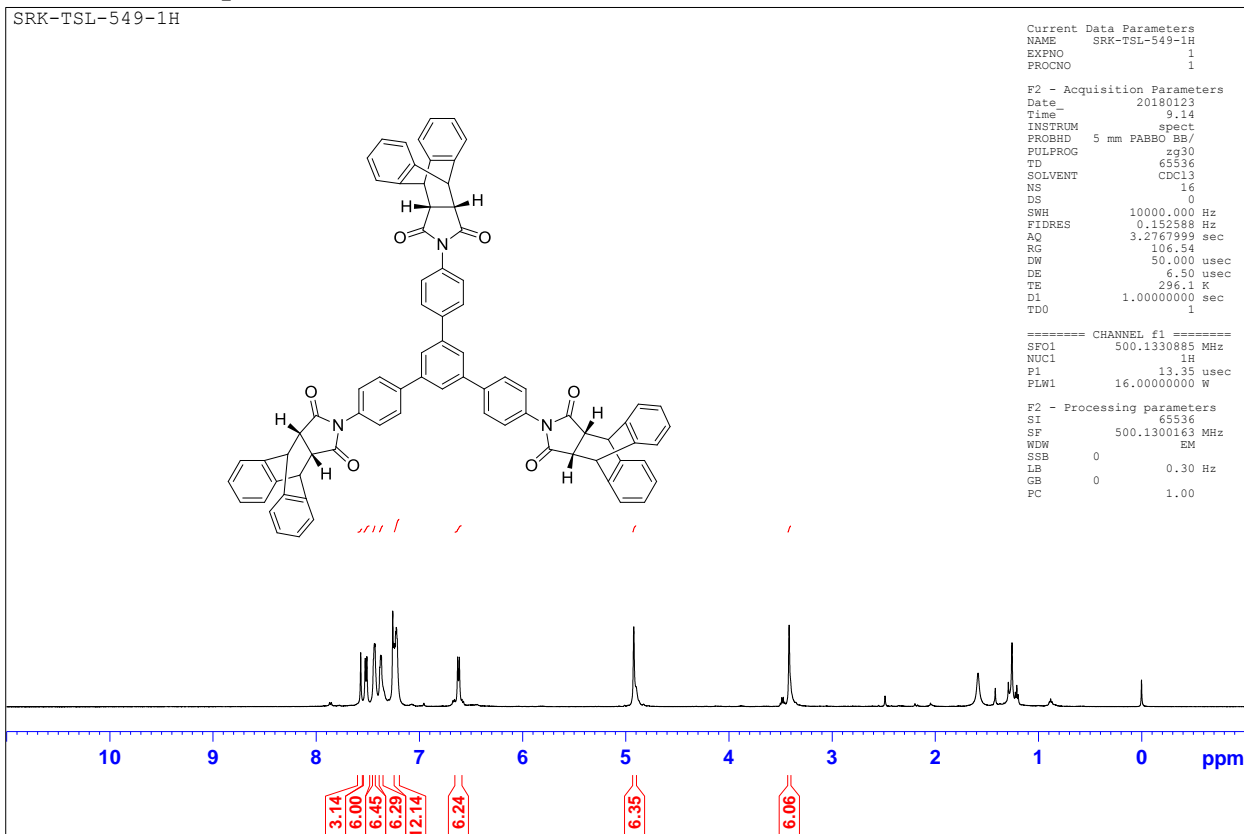

# <sup>13</sup>C NMR of compound 19 in CDCl<sub>3</sub>

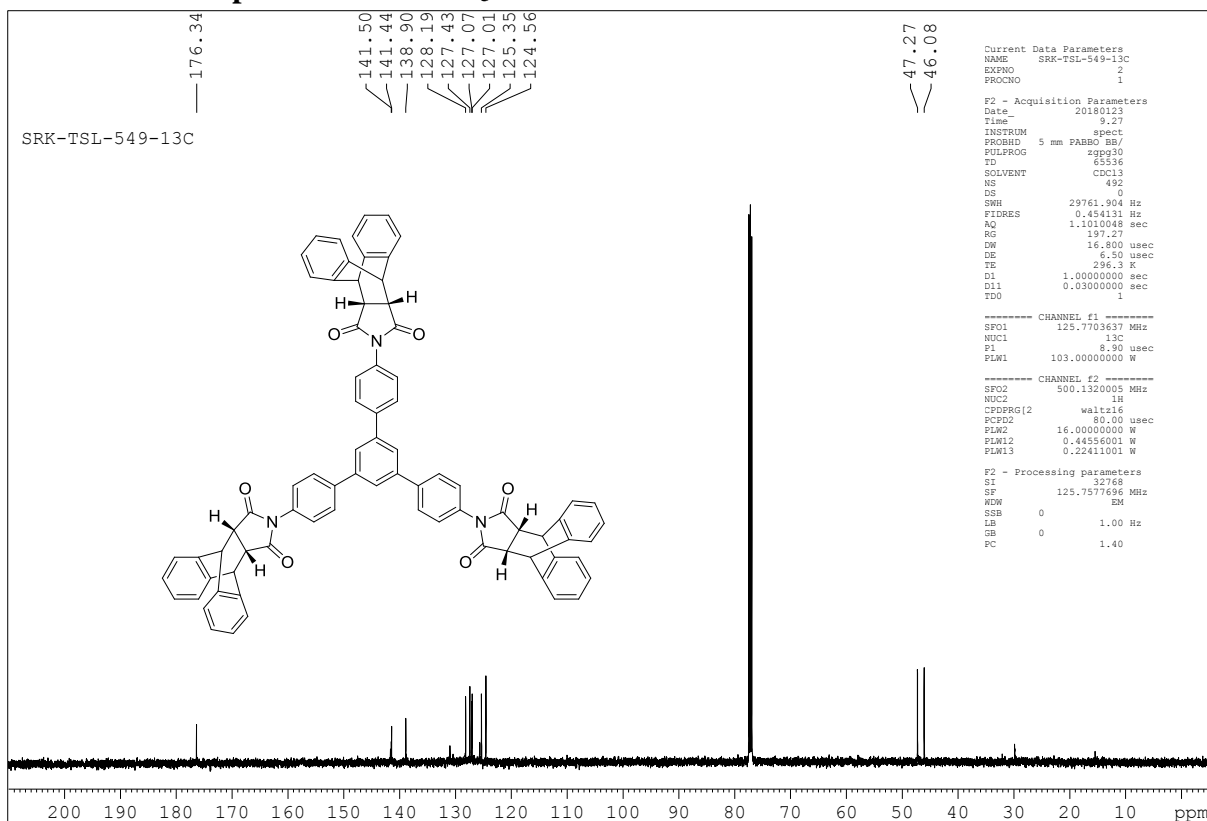

# HRMS of Compound 19

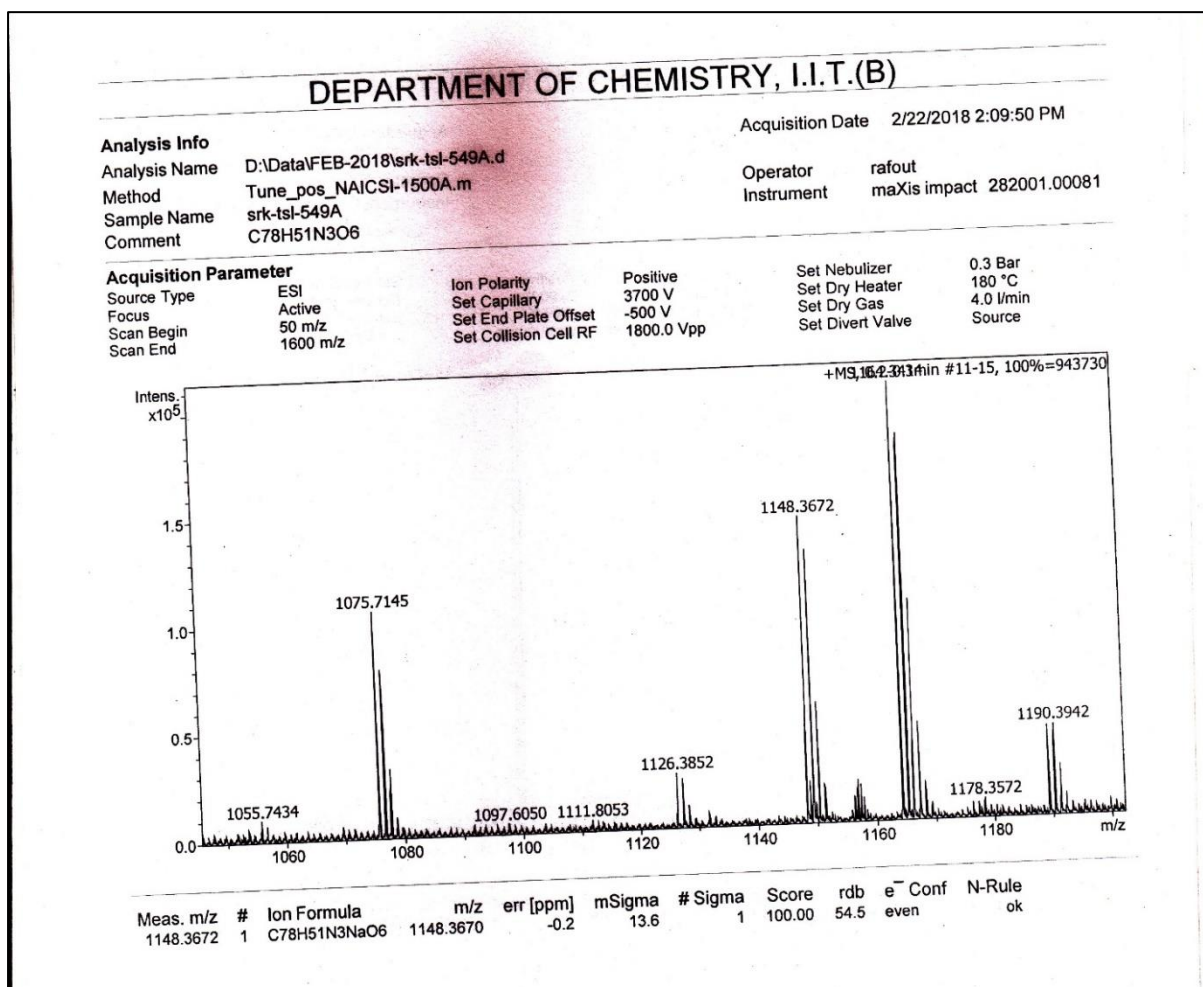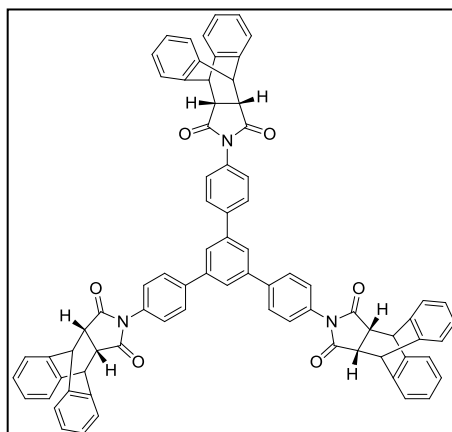

# <sup>1</sup>H NMR of compound 20 in CDCl<sub>3</sub>

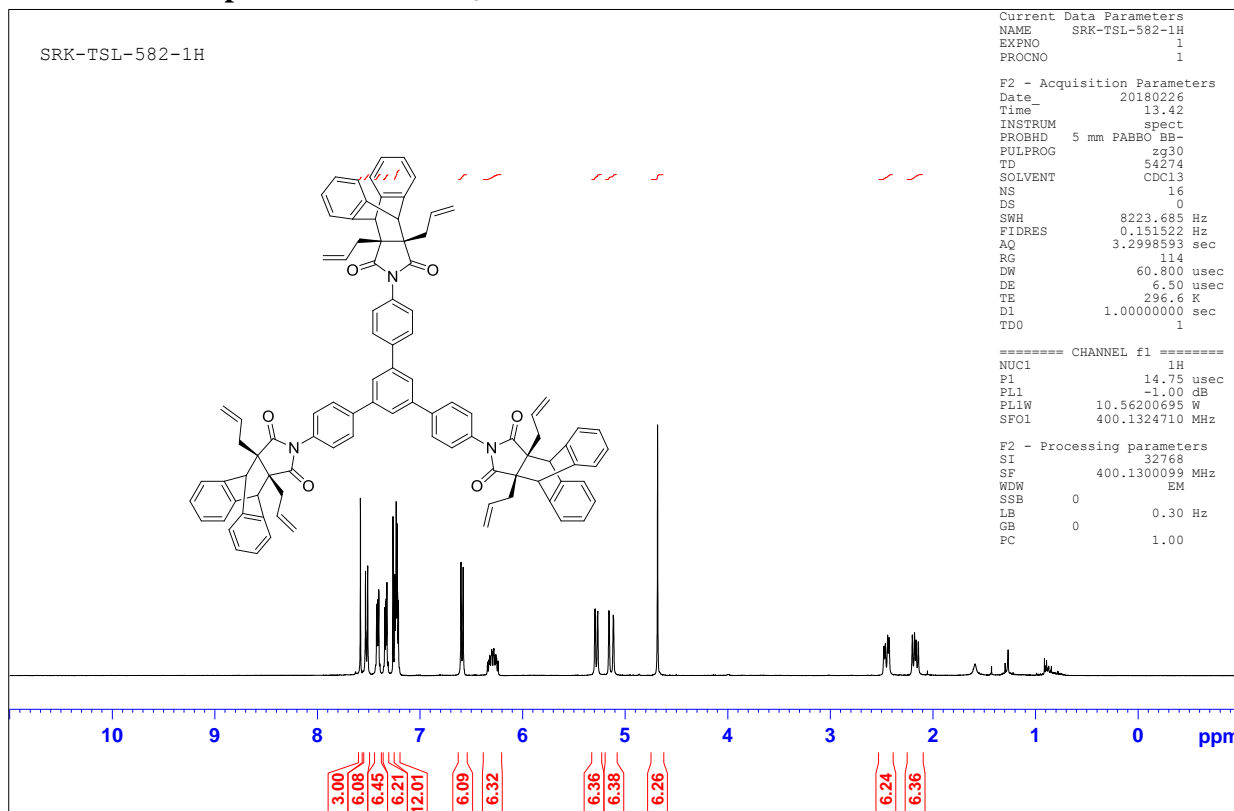

# <sup>13</sup>C NMR of compound 20 in CDCl<sub>3</sub>

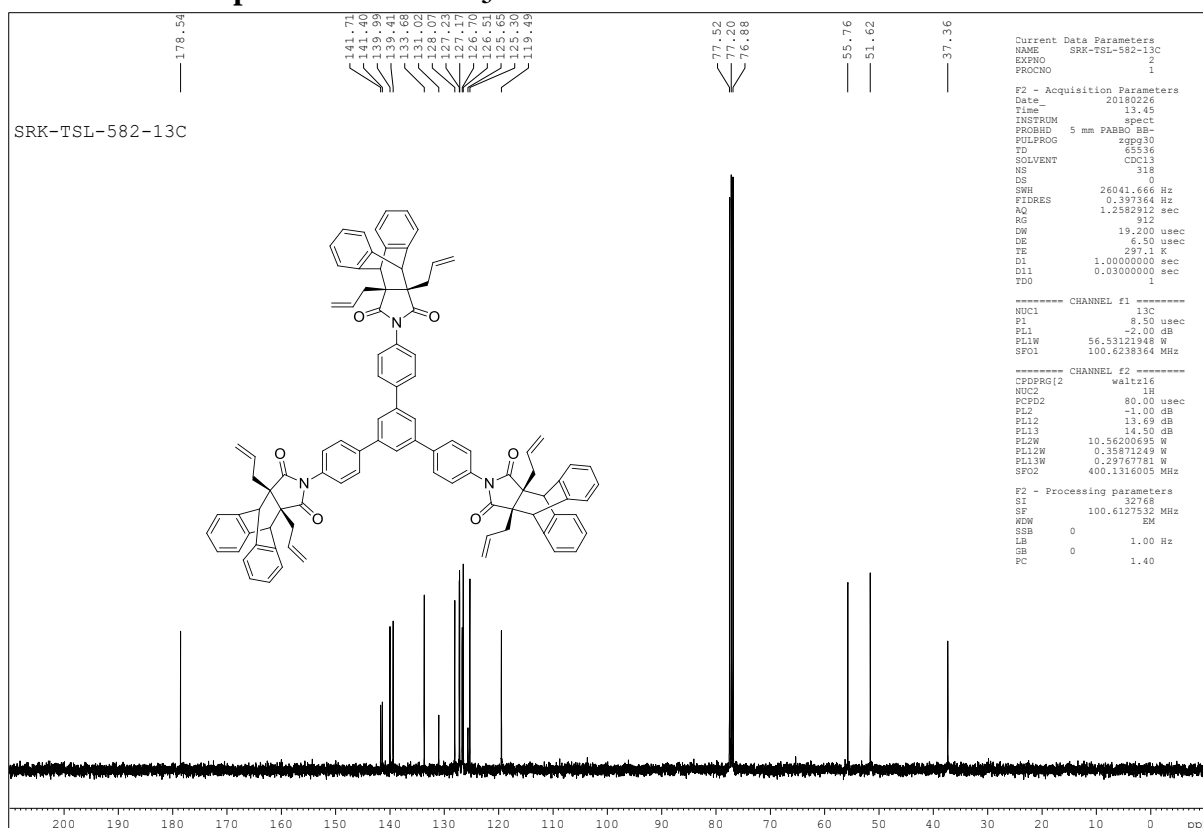

# HRMS of compound 20

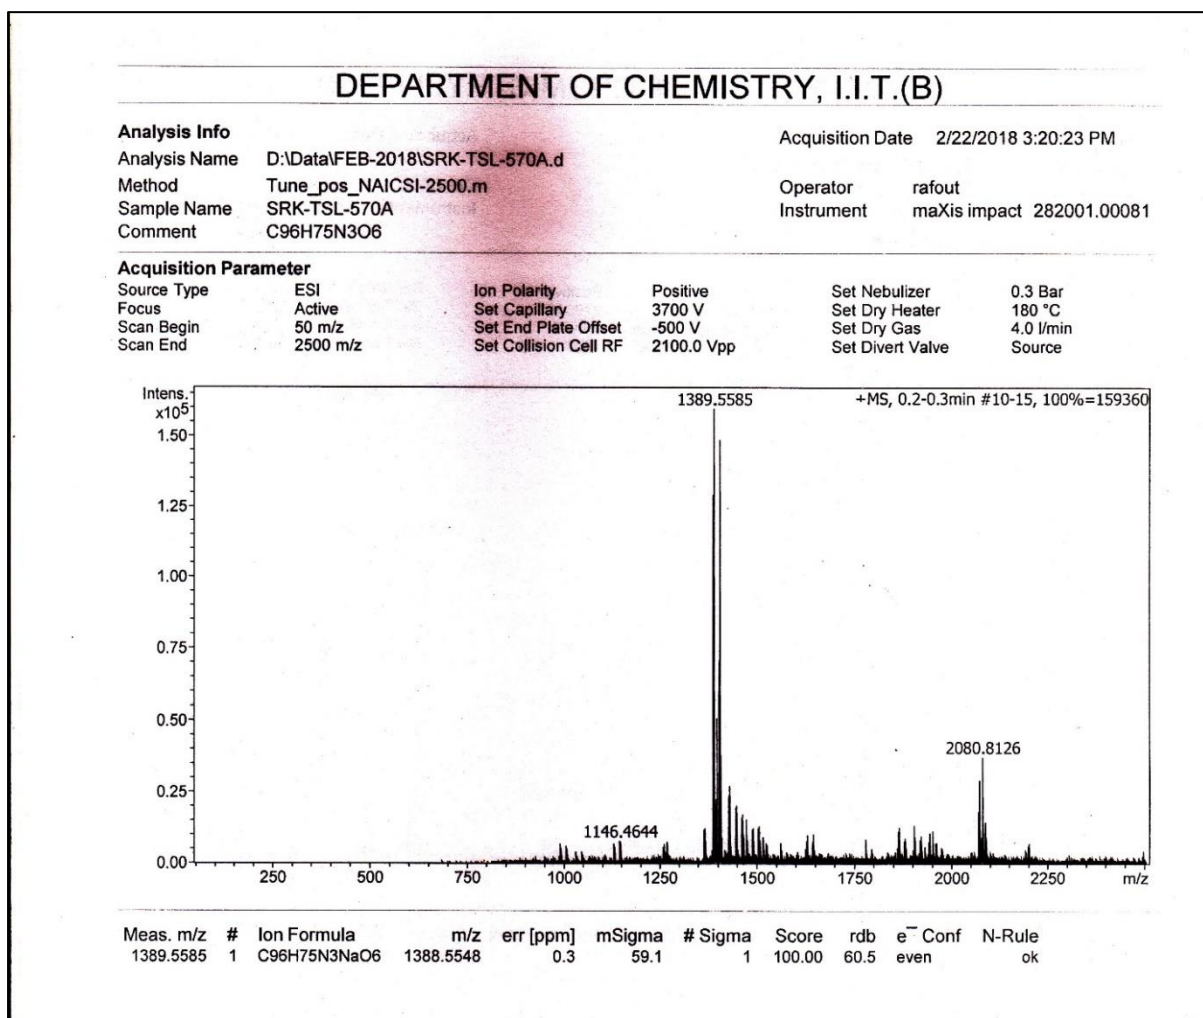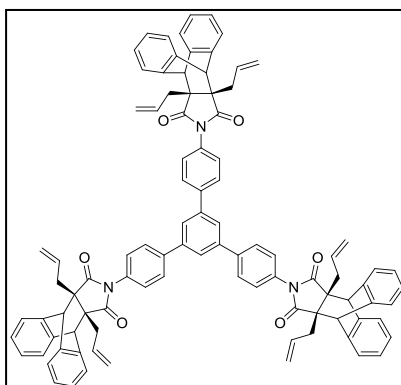

# <sup>1</sup>H NMR of compound 13 in CDCl<sub>3</sub>

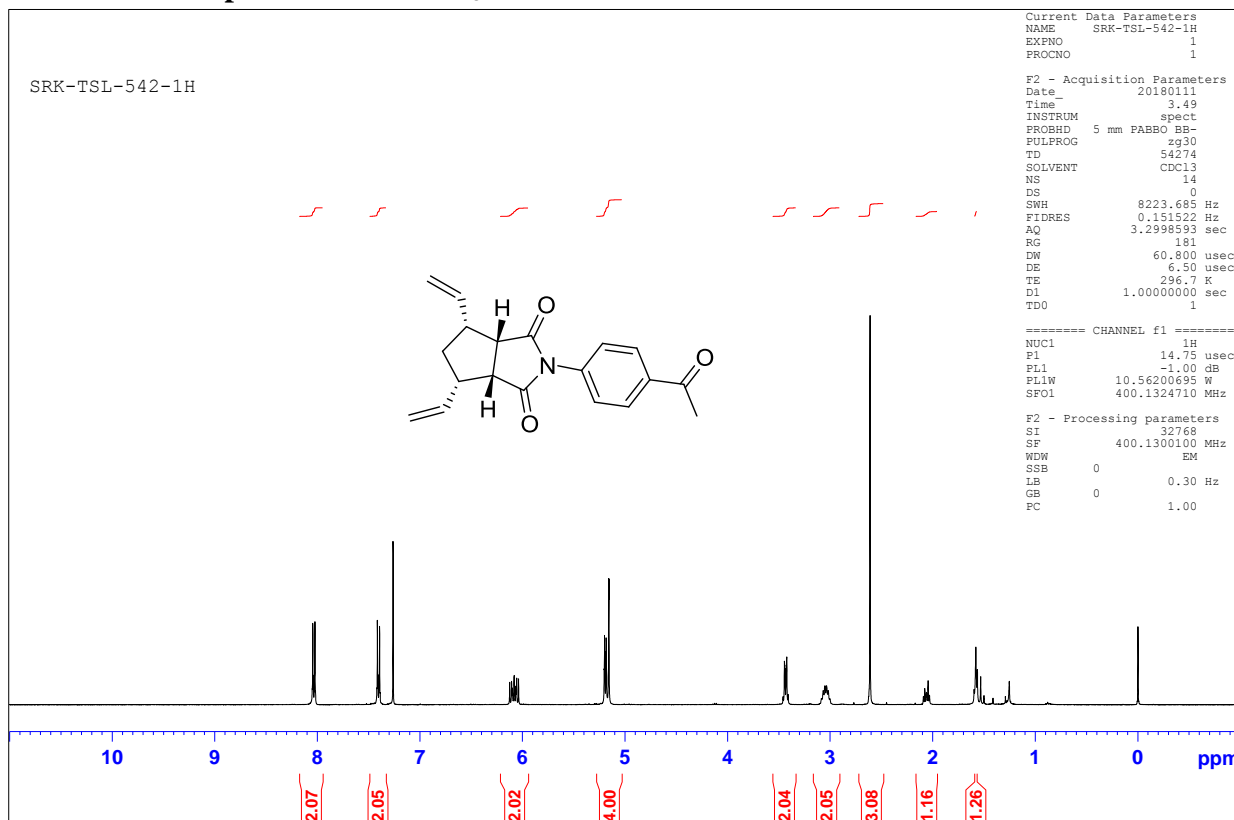

# <sup>13</sup>C NMR of compound 13 in CDCl<sub>3</sub>

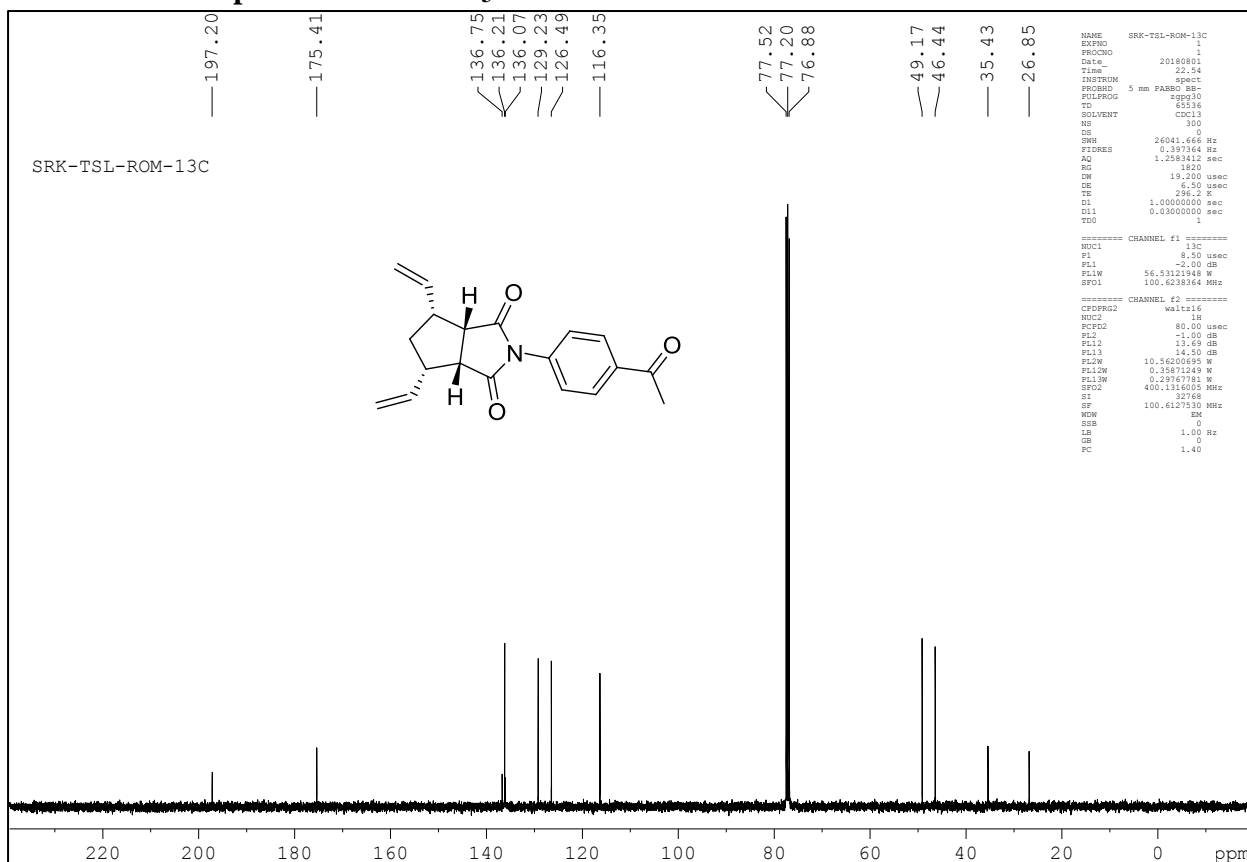



# HRMS of Compound 13

## DEPARTMENT OF CHEMISTRY, I.I.T.(B)

### Analysis Info

Analysis Name D:\Data\FEB-2018\SRK-TSL-562.d  
 Method Tune\_pos\_NAICSI-500a.m  
 Sample Name SRK-TSL-562  
 Comment C19H19NO3

Acquisition Date 2/6/2018 9:40:42 PM

Operator ssk out  
 Instrument maXis impact 282001.00081

### Acquisition Parameter

|             |          |                       |           |                  |           |
|-------------|----------|-----------------------|-----------|------------------|-----------|
| Source Type | ESI      | Ion Polarity          | Positive  | Set Nebulizer    | 0.4 Bar   |
| Focus       | Active   | Set Capillary         | 3700 V    | Set Dry Heater   | 180 °C    |
| Scan Begin  | 50 m/z   | Set End Plate Offset  | -500 V    | Set Dry Gas      | 4.0 l/min |
| Scan End    | 1000 m/z | Set Collision Cell RF | 950.0 Vpp | Set Divert Valve | Source    |

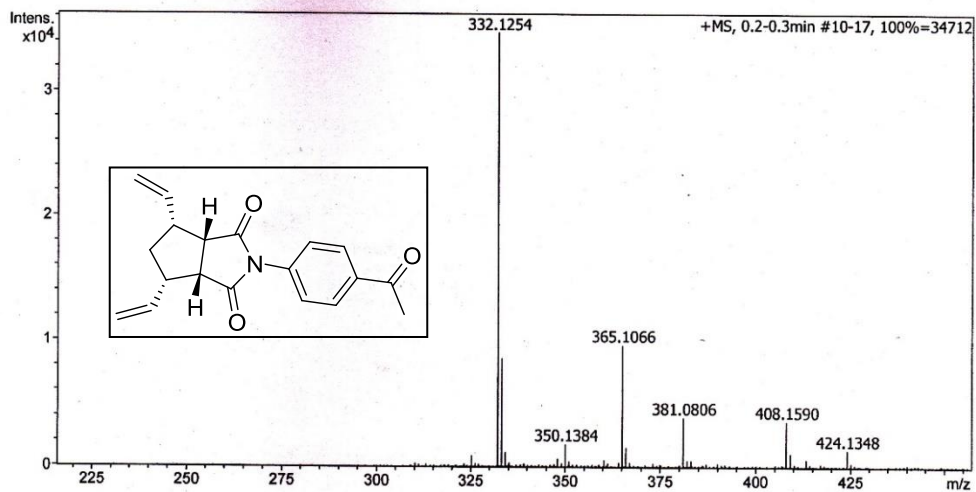

| Meas. m/z | # | Ion Formula | m/z      | err [ppm] | mSigma | # Sigma | Score  | rdb  | e <sup>-</sup> Conf | N-Rule |
|-----------|---|-------------|----------|-----------|--------|---------|--------|------|---------------------|--------|
| 332.1254  | 1 | C19H19NNaO3 | 332.1257 | -0.8      | 20.8   | 1       | 100.00 | 10.5 | even                | ok     |

# <sup>1</sup>H NMR of compound 12 in CDCl<sub>3</sub>

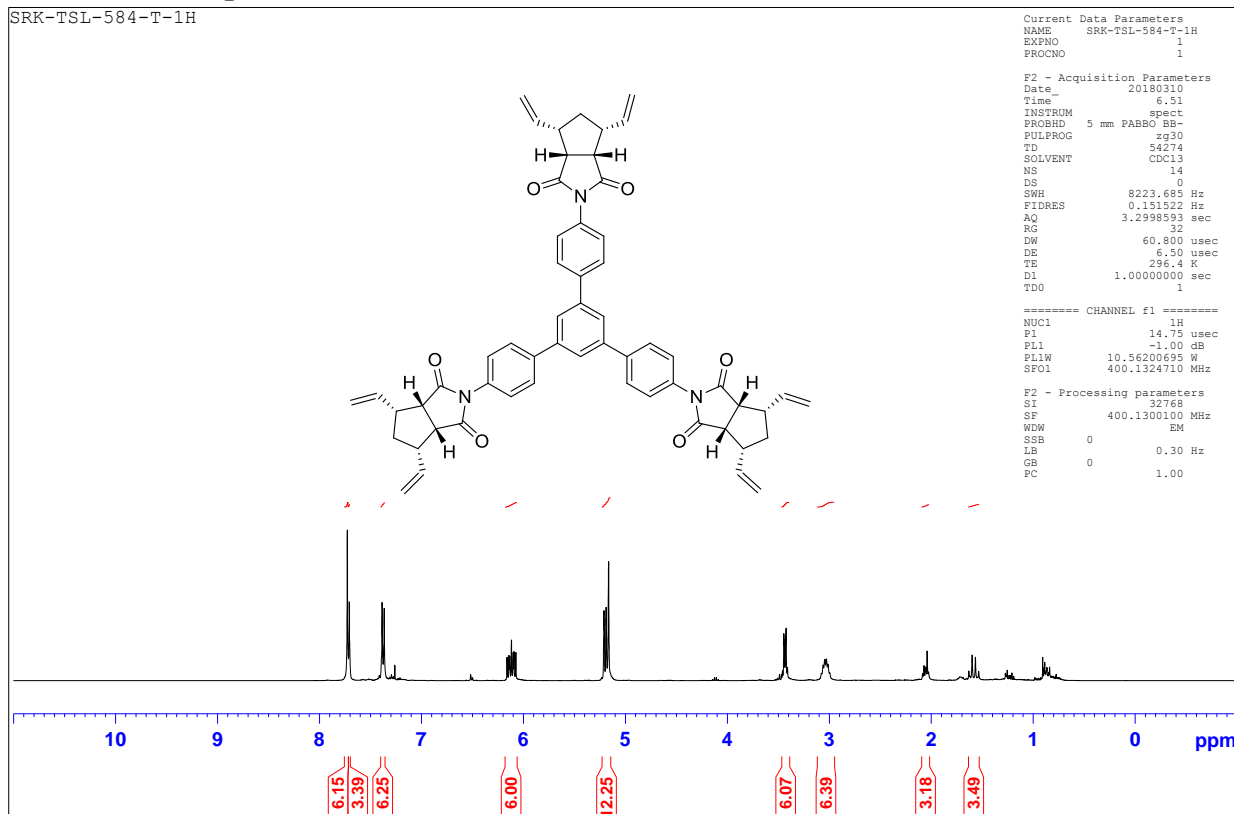

# <sup>13</sup>C NMR of compound 12 in CDCl<sub>3</sub>

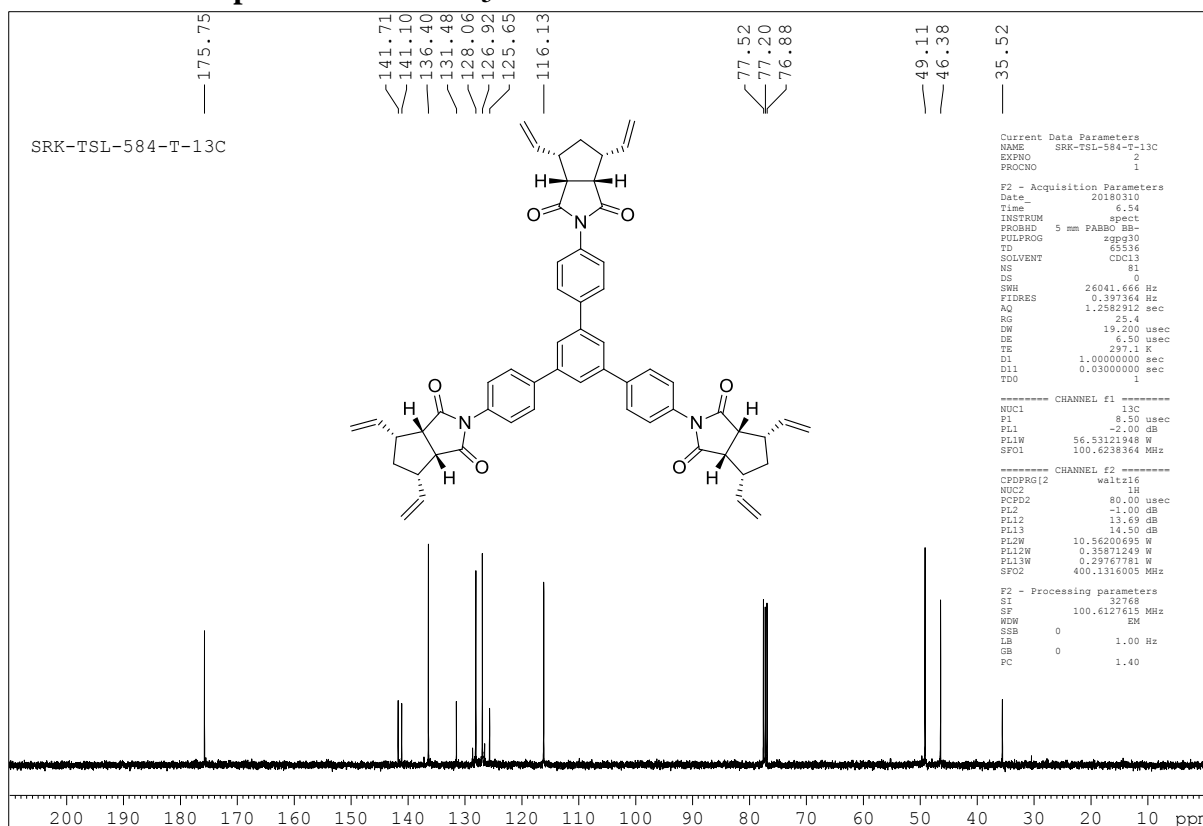

# HRMS of Compound 12

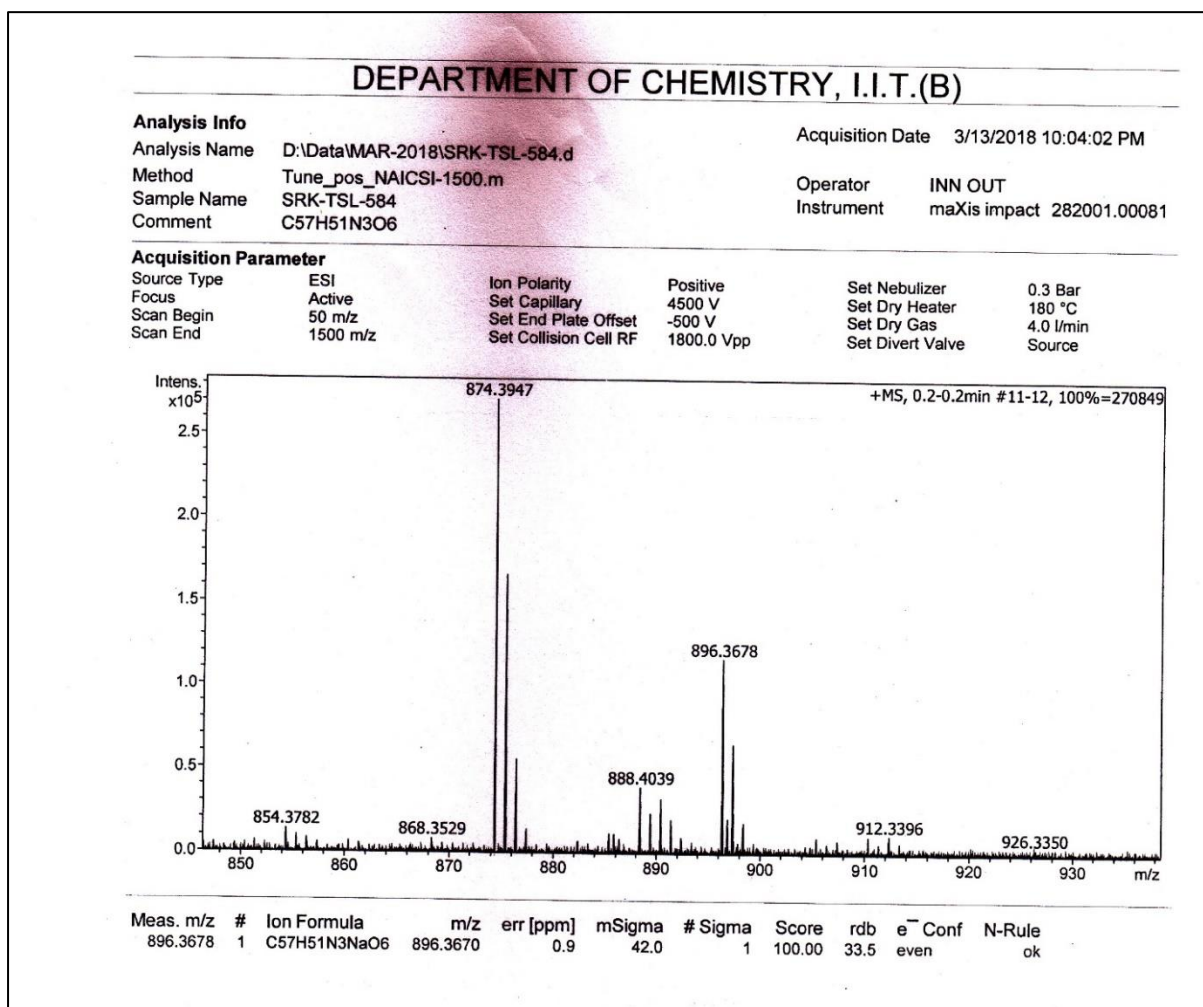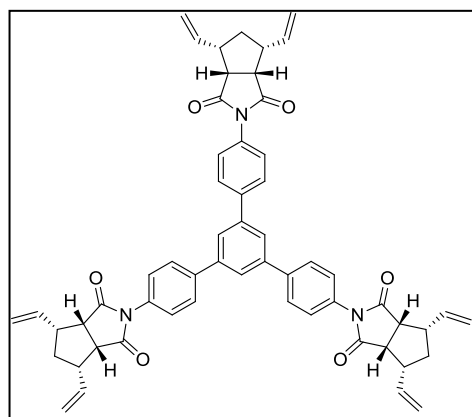

# <sup>1</sup>H NMR of compound 14 in CDCl<sub>3</sub>

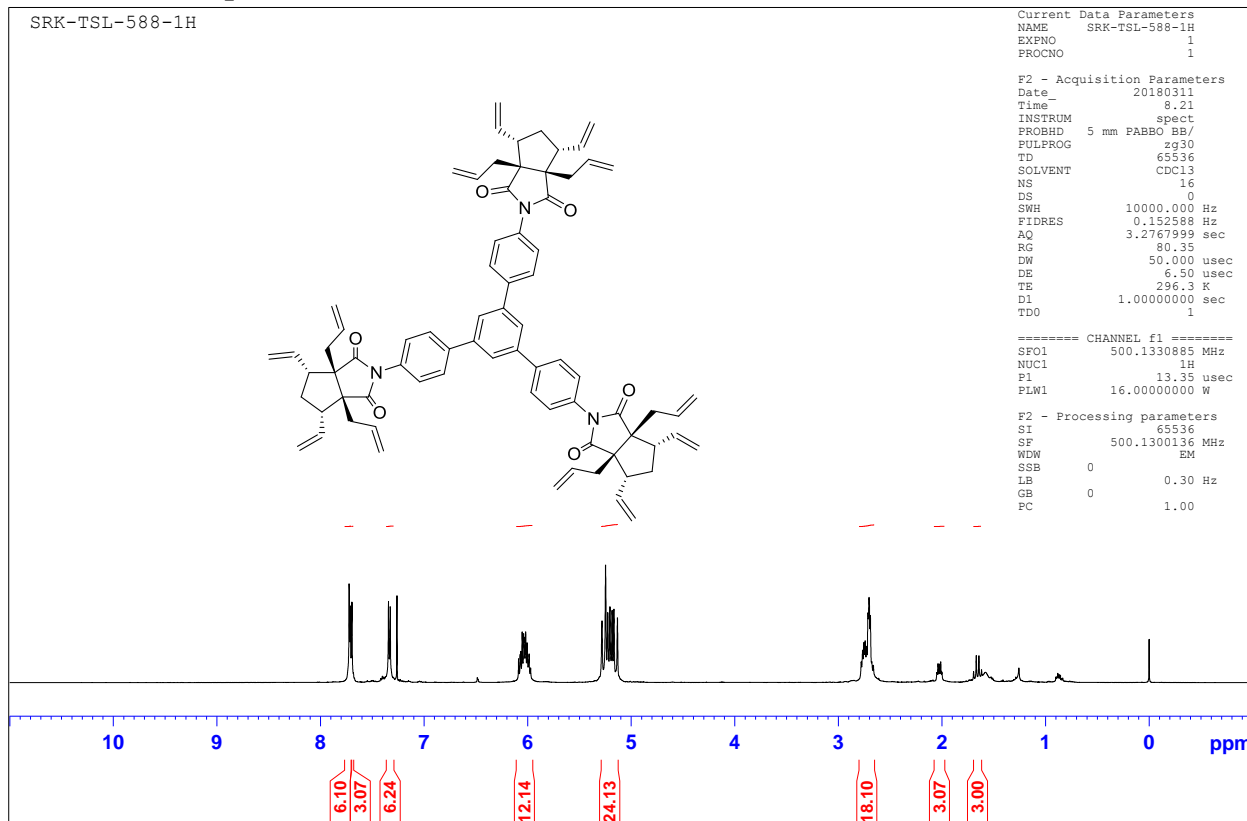

# <sup>13</sup>C NMR of compound 14 in CDCl<sub>3</sub>

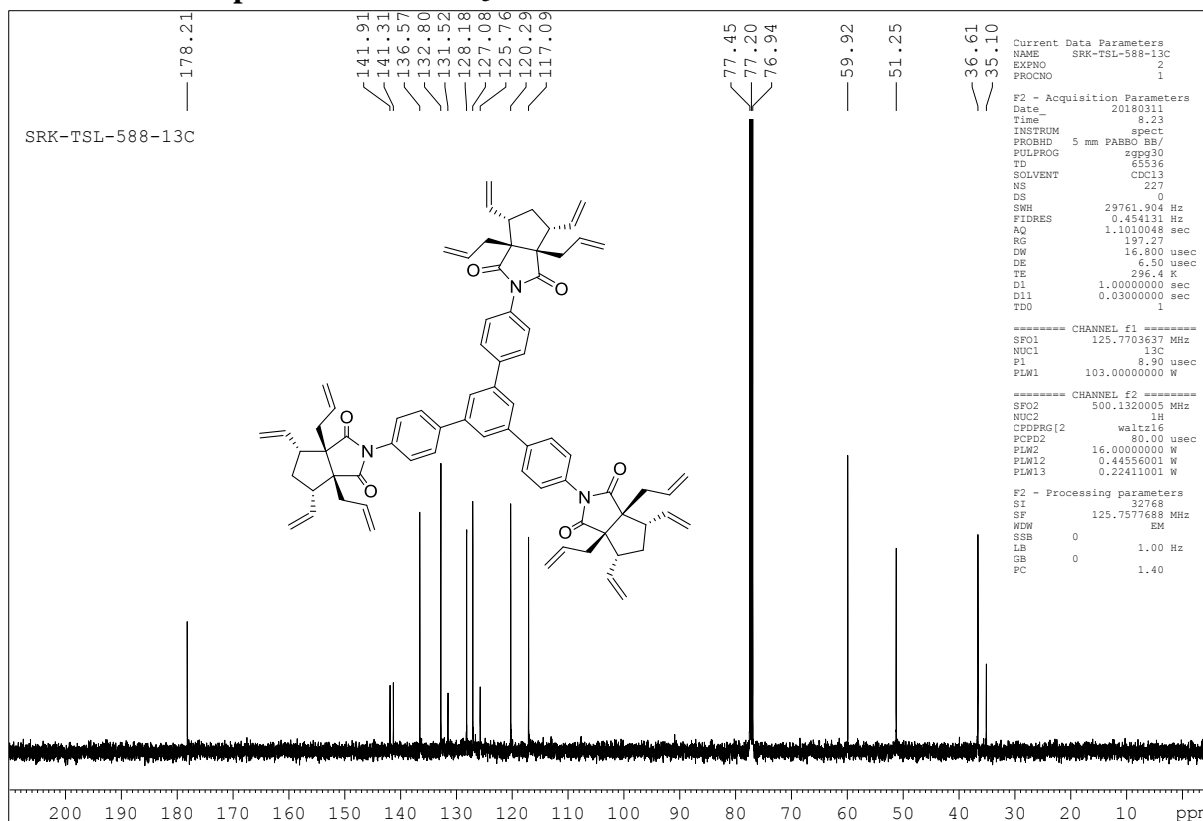

# HRMS of Compound 14

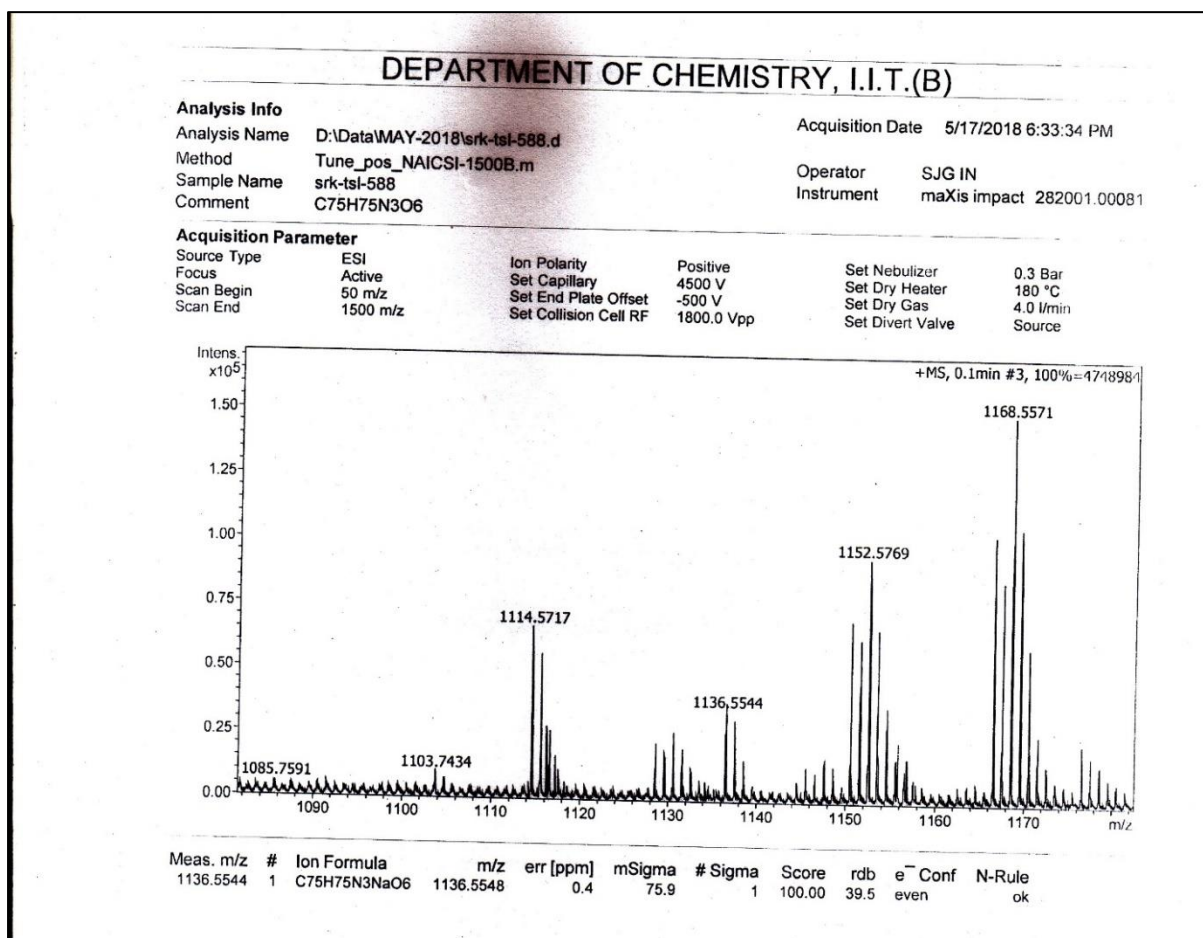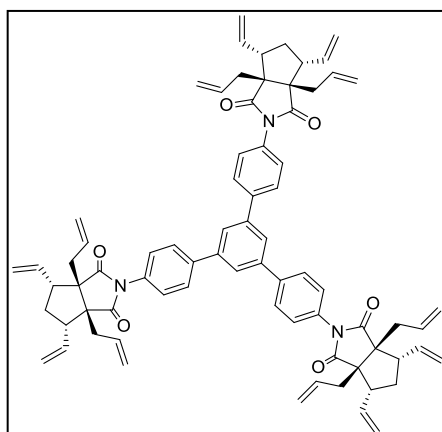

### <sup>13</sup>C NMR of compound 15 in CDCl<sub>3</sub>

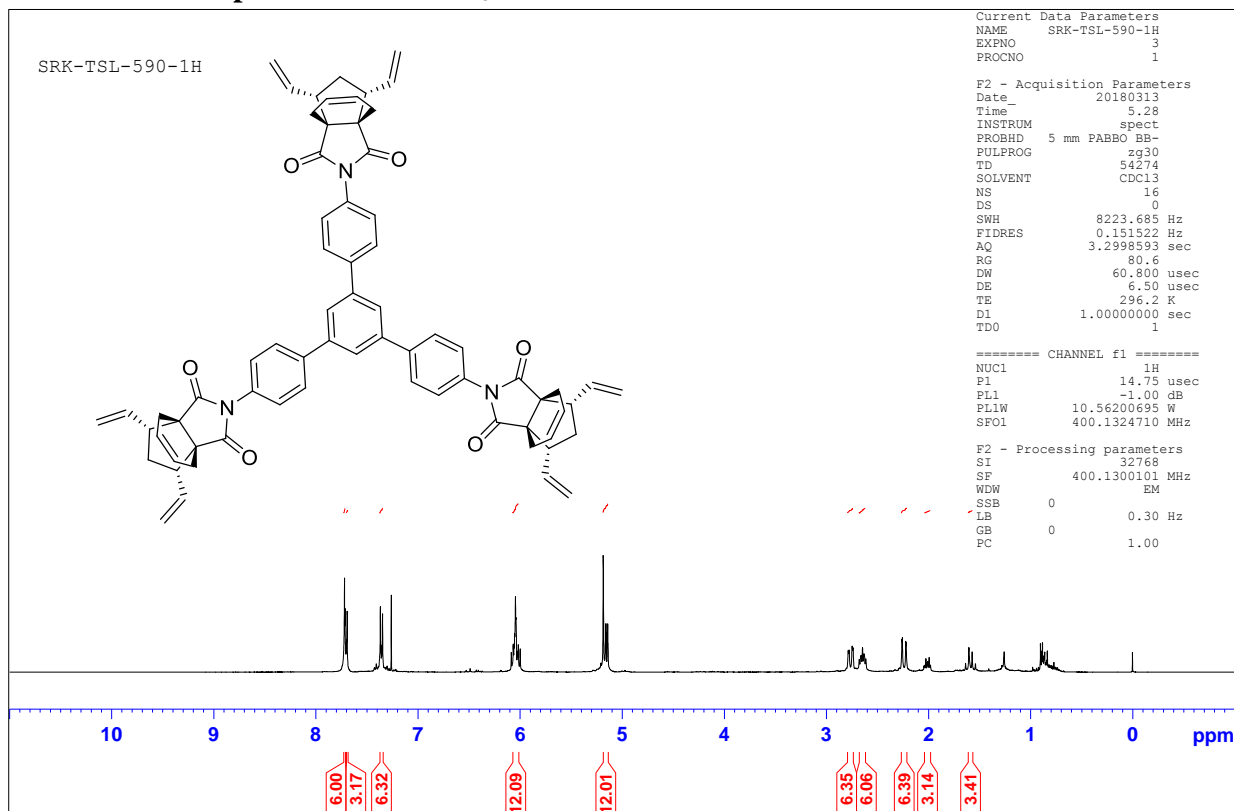

### <sup>13</sup>C NMR of compound 15 in CDCl<sub>3</sub>

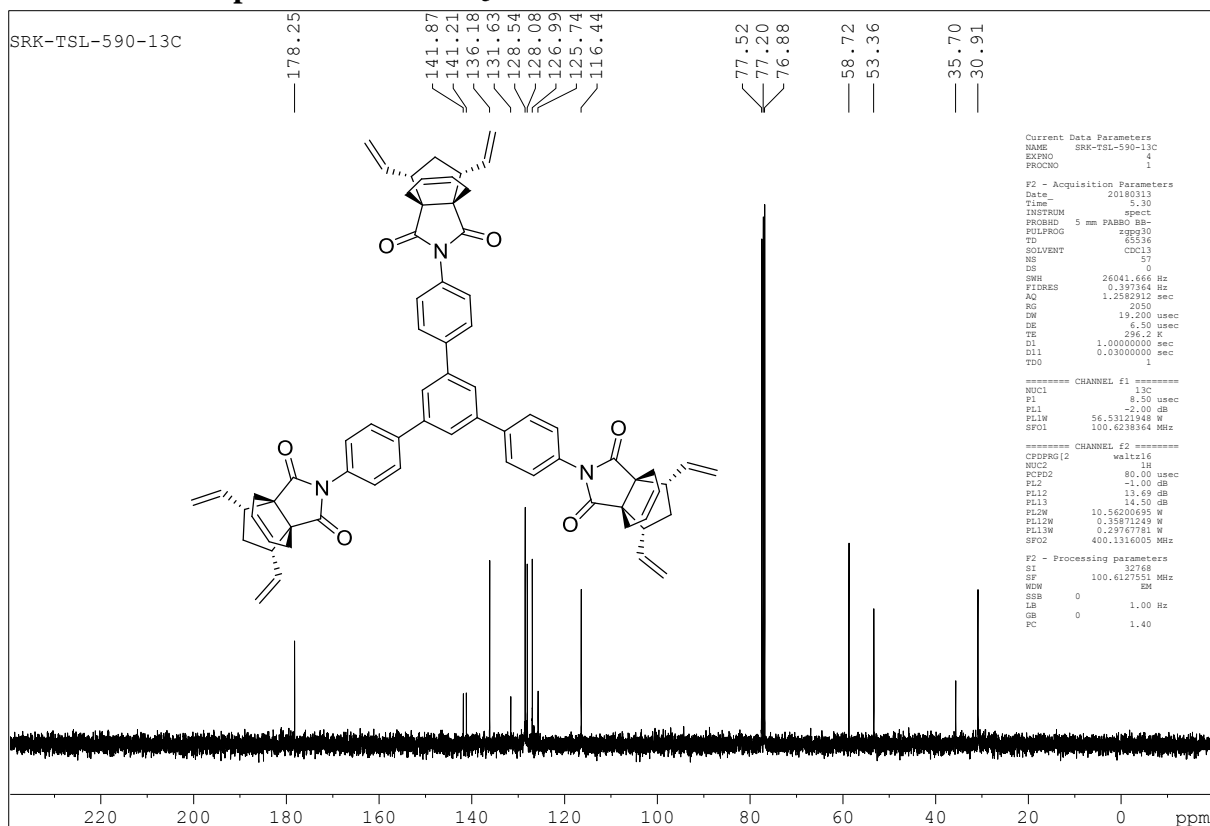

# HRMS of Compound 15

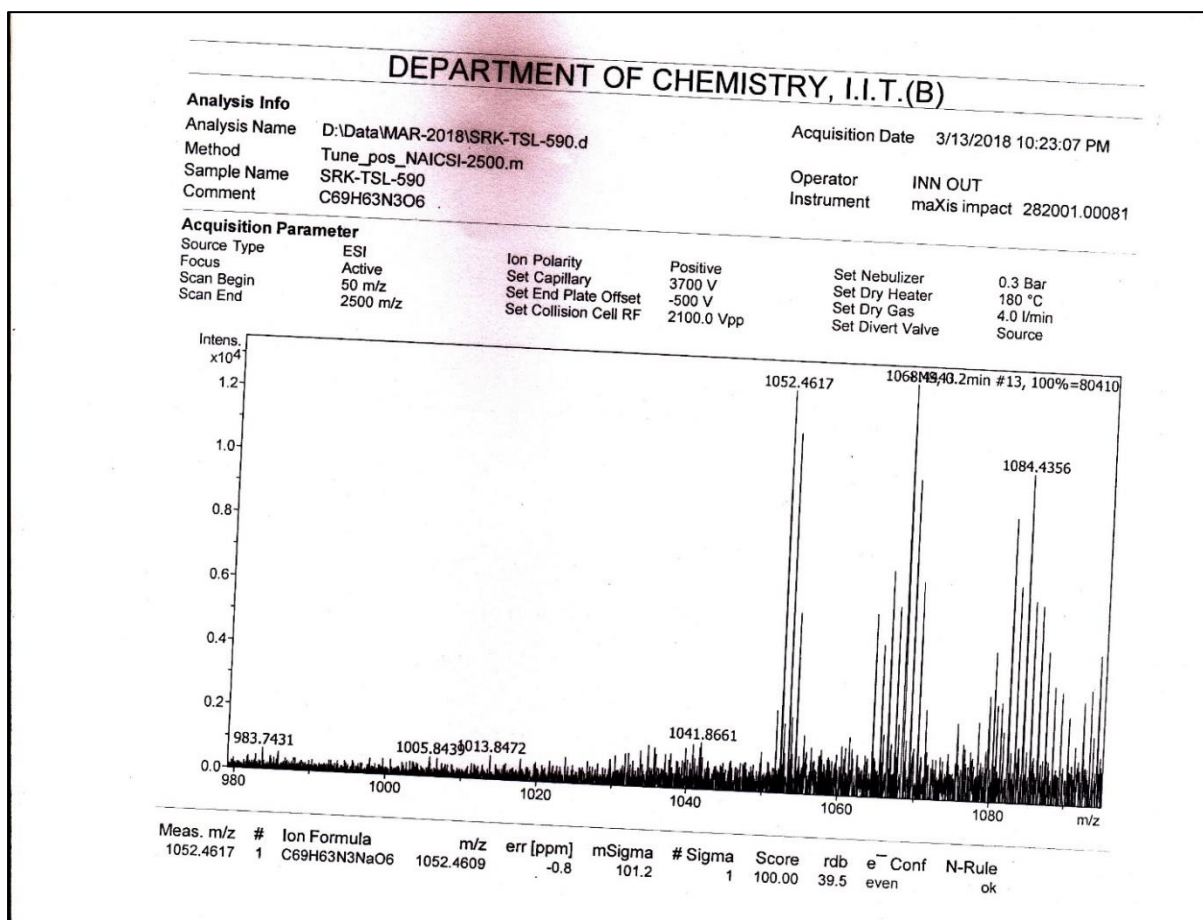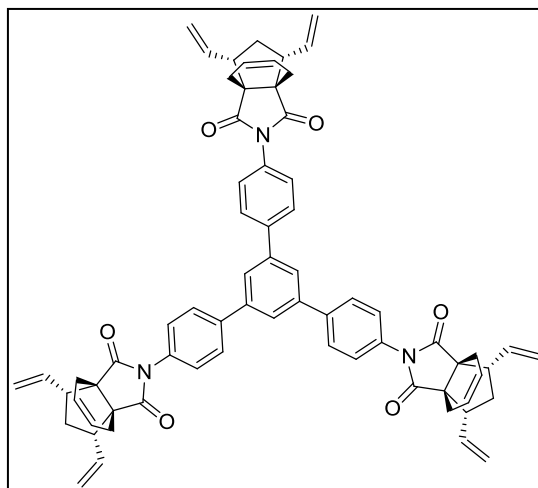

### <sup>13</sup>C NMR of compound 21 in CDCl<sub>3</sub>

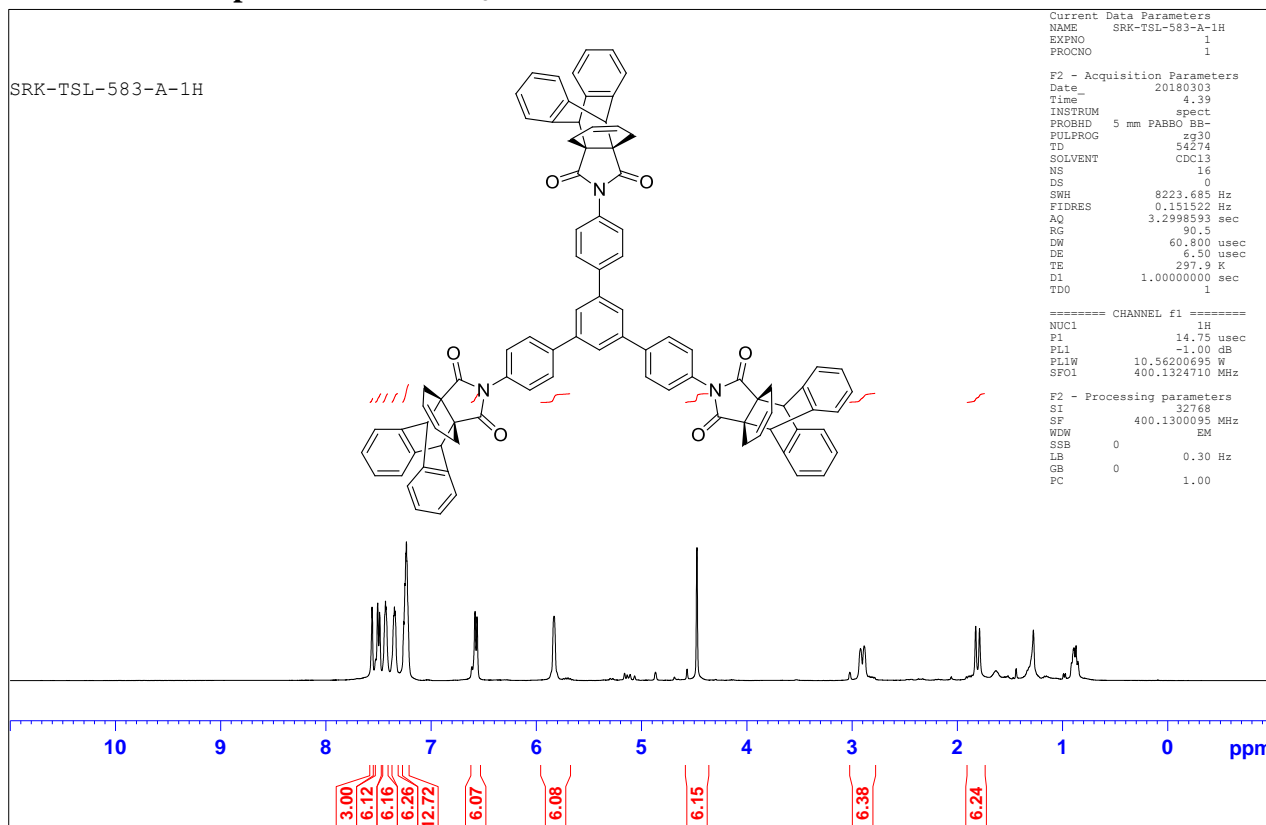

### <sup>13</sup>C NMR of compound 21 in CDCl<sub>3</sub>

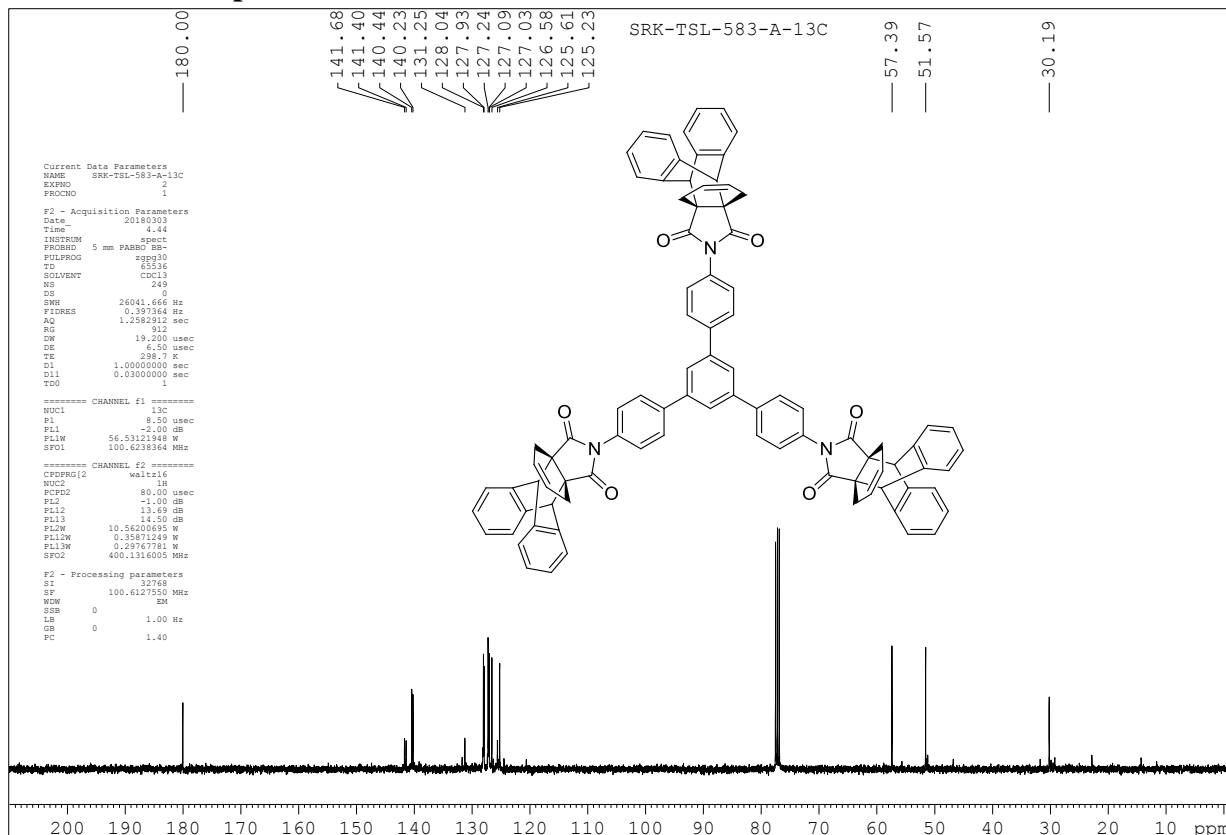



# HRMS of Compound 21

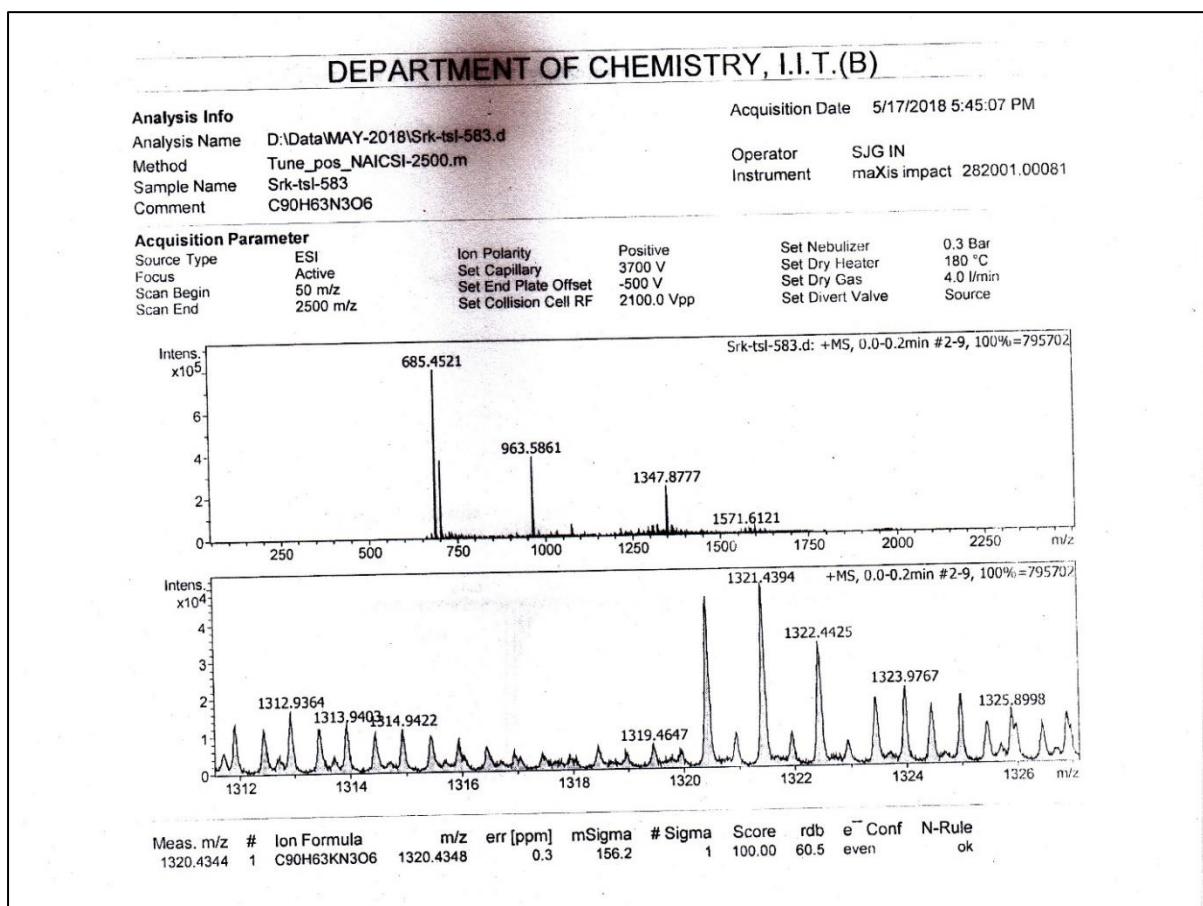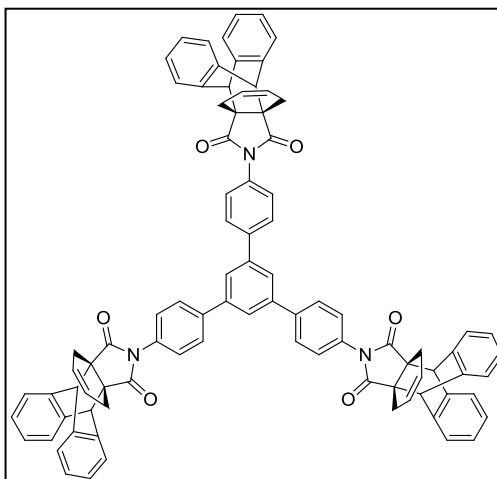

Supplement: Beilstein_J_Org_Chem-14-2537-s001.pdf [file Beilstein_J_Org_Chem-14-2537-s001.pdf]
